# Supplementary material for: Satellite-derived sulfur dioxide (SO 2 ) emissions from the 2014–2015 Holuhraun eruption (Iceland)
Source: Copernicus journal article supplement (doi:10.5194/acp-19-4851-2019), 2019-04-11
Supplement: Supplementary file 1 [file acp-19-4851-2019-supplement.zip]

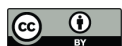

## *Supplement of*

# **Satellite-derived sulfur dioxide (SO<sub>2</sub>) emissions from the 2014–2015 Holuhraun eruption (Iceland)**

**Elisa Carboni et al.**

*Correspondence to:* Elisa Carboni ([elisa.carboni@physics.ox.ac.uk](mailto:elisa.carboni@physics.ox.ac.uk))

- [acp-19-4851-2019-supplement-title-page.pdf](#)
- [Brewer\\_SO2\\_Sodankyla2014.csv](#)
- [Carboni-supporting\\_information.docx](#)
- [ms01.gif](#)

The copyright of individual parts of the supplement might differ from the CC BY 4.0 License.
